# Supplementary material for: Elucidating the growth mechanism of ZnO films by atomic layer deposition with oxygen gas via isotopic tracking
Source: Royal Society of Chemistry journal article supplement (doi:10.1039/d0tc05439a), 2021-01-01
Supplement: d0tc05439a1.pdf [file d0tc05439a1.pdf]

## SUPPORTING INFORMATION

### **Elucidating the growth mechanism of ZnO films by Atomic Layer Deposition with Oxygen Gas via isotopic tracking**

**Authors:** Tai Nguyen<sup>1,2</sup>, Nathalie Valle<sup>1</sup>, Jérôme Guillot<sup>1</sup>, Jérôme Bour<sup>1</sup>, Nouredine Adjeroud<sup>1</sup>, Yves Fleming<sup>1</sup>, Mael Guennou<sup>2</sup>, Jean-Nicolas Audinot<sup>1</sup>, Brahime El Adib<sup>1</sup>, Raoul Joly<sup>1,2</sup>, Didier Arl<sup>1</sup>, Gilles Frache<sup>1</sup>, and Jérôme Polesel-Maris<sup>1,\*</sup>

<sup>1</sup>*Materials Research and Technology Department, Luxembourg Institute of Science and Technology, 41, rue du Brill, L-4422 Belvaux, Luxembourg*

<sup>2</sup>*Department of Physics and Materials Science, University of Luxembourg, 41 rue du Brill, L-4422 Belvaux, Luxembourg*

\* Corresponding author: [jerome.polesel@list.lu](mailto:jerome.polesel@list.lu)

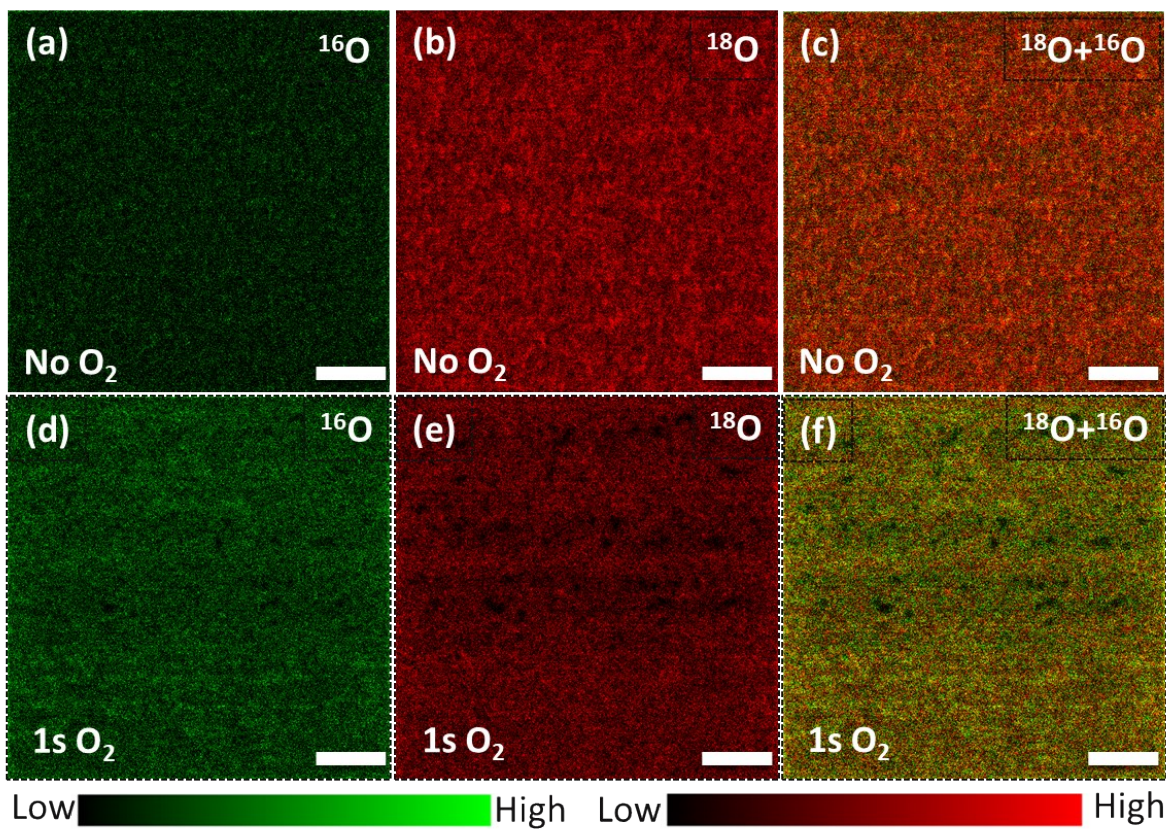

Figure S1: HIM-SIMS mapping. Distribution of  $^{18}\text{O}$  (the red scale bar) and  $^{16}\text{O}$  (the green scale bar), and respective overlaps of ( $^{18}\text{O} + ^{16}\text{O}$ ) of ZnO samples synthesized with and without 1 s of oxygen gas pulsing for each ALD loop at a deposition temperature of 180 °C. The scale bar is 500 nm.

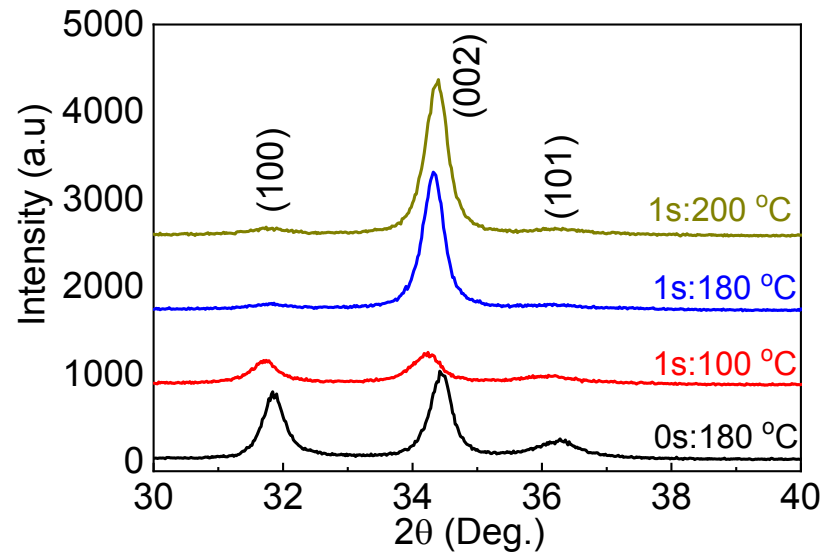

Figure S2: XRD spectra of the ZnO thin film grown with and without oxygen gas pulsing at different deposition temperatures.

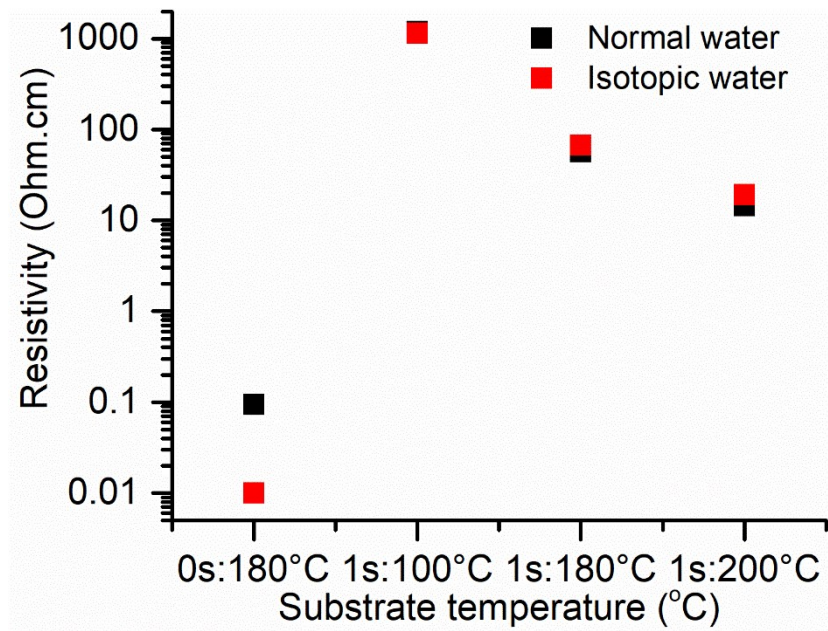

Figure S3: Electrical resistivity of ZnO thin films grown at different temperatures with conventional DI water and  $^{18}\text{O}$ -labelled water.
